1                                   **The effect of climate change on the distribution of Canidae**

2

3 Prediction of current and future distribution of canids.

4

5 Lucas M. V. Porto<sup>1,2\*</sup>, David Bennett, Renan Maestri<sup>2,3</sup>, and Rampal S. Etienne<sup>1</sup>

6

7 <sup>1</sup>*Groningen Institute for Evolutionary Life Sciences, University of Groningen, PO Box 11103,*  
8 *9700 CC Groningen, The Netherlands;*

9 <sup>2</sup>*Programa de Pós-Graduação em Ecologia, Universidade Federal do Rio Grande do Sul, PO*  
10 *Box: 15007, Porto Alegre, Rio Grande do Sul, Brazil;*

11 <sup>3</sup>*Negaunee Integrative Research Center, The Field Museum of Natural History, Chicago-IL,*  
12 *USA.*

13

14 \**E-mail corresponding author: lucasmvporto@gmail.com*

15 \* <https://orcid.org/0000-0001-8862-9839>

16

17 **ABSTRACT**

18 Land use by humans and climate change have been seriously affecting the distribution of  
19 species resulting in a quarter of all known mammals currently threatened with extinction.  
20 Here, we modeled the present and future potential distributions of all 36 extant Canidae  
21 species to evaluate their response to future climate scenarios. In addition, we tested if canids  
22 were likely to experience evolutionary rescue, which could allow some species to adapt to  
23 climate change. Our results suggest that global warming will cause most species to lose or  
24 maintain their ranges, while a few will have the potential to benefit from future conditions and  
25 considerably expand their geographic distributions. Some canids have the potential to  
26 experience evolutionary rescue, but *Atelocynus microtis* and *Chrysocyon brachyurus* are two  
27 concerning cases that do not show this capacity to adapt given the current pace of climate  
28 change. We also reveal that most Canidae hotspot regions are outside protected areas, which  
29 may be useful for the identification of key areas for conservation.

30

31 **KEYWORDS:** adaptation, ecological niche models, environmental change, geographical  
32 ranges, Haldanes.

33

## 34 **1 INTRODUCTION**

35 The pace of climate change induced by humans is much faster than predicted previously  
36 (Pimm et al., 2014). Ceballos et al. (2015) showed that the rate of vertebrate species loss over  
37 the last century is up to 100 times higher than the background extinction rate. This  
38 anthropogenic pressure causes habitat loss and increased competition from invasive  
39 organisms (Butchart et al., 2010), which leads to species extinction (Ceballos et al., 2015;  
40 May & Lawton, 1995), and thus has serious impacts on global biodiversity. Over the last  
41 decades, several studies have shown how human impacts affect the structure of ecosystems  
42 and how these changes can backfire and affect humans negatively with floods, fires, air  
43 pollution, heat waves, and vector-borne diseases (Bellard et al., 2012; Cardinale et al., 2012;  
44 Goberna et al., 2014; Kortsch et al., 2015; Nadeau et al., 2017; Parmesan & Yohe, 2003; Pecl  
45 et al., 2017; Woodward et al., 2010). Some species are more susceptible to extinction than  
46 others due to their traits, including: reproductive rate, habitat specialization, body size, and  
47 geographic range (Davidson et al., 2009; Fritz & Purvis, 2010). Therefore, understanding how  
48 species are going to respond in future scenarios of climate change is necessary to predict the  
49 impact of the loss of certain species on ecosystems, and it will be useful for conservation of  
50 biodiversity.

51       Until recently, evolution was thought to play no substantial role in a population's  
52 resilience when facing a rapid environmental change (Ferrière et al., 2004). The common idea  
53 was that a population in decline, exposed to a deteriorating environment, would become  
54 extinct. However, Gonzalez et al. (2012) and Bell (2013) coined and matured the idea of  
55 evolutionary rescue (ER). In an ER scenario, adaptive processes could be triggered in some  
56 resistant individuals of the population under environmental stress, allowing them to rapidly  
57 proliferate and counter the rate of decline of the population, thereby changing our perspective  
58 on communities with populations that are threatened with extinction (van Eldijk et al., 2020).

59       The most used tools to evaluate how species are dealing with climate change are  
60 ecological niche models (ENMs) (Araújo & New, 2007; Ehrlén & Morris, 2015; Elith et al.,  
61 2010; Guisan & Thuiller, 2005). ENMs use mathematical modelling of a species' relationship  
62 with environmental variables, and predict habitat suitability for that species based on known  
63 occurrence data (Araújo et al., 2011; Guisan & Thuiller, 2005). ENMs based on climate data  
64 have proven extremely useful in assessing the effectiveness of the distribution of protected  
65 areas (Catullo et al., 2008), assessing species vulnerability to local land-use changes (Santos

66 et al., 2013), predicting distributions of rare species (Marino et al., 2011; Rheingantz et al.,  
67 2014), and predicting possible responses to climate change by species and ecosystems (Moor  
68 et al., 2015; Sobral-Souza et al., 2018).

69 However, the use of ENMs with climatic variables alone has been debated in several  
70 studies (Diniz-Filho et al., 2019; Elith et al., 2010; Synes & Osborne, 2011), mainly because  
71 ENMs do not incorporate intrinsic characteristics of the populations, relying on the idea that  
72 all the mechanisms that affect species` distributions are captured by the environmental data  
73 (Diniz-Filho et al., 2019). However, niche models that use traits (morphological and  
74 physiological) or genetic data are complex and do not work well when the niches of several  
75 species are modeled simultaneously (Norberg et al., 2012).

76 The attempt to predict responses of species to climate change is further limited by  
77 uncertainties surrounding climatic predictions - with slight differences existing between  
78 different general circulation models (GCM) - and by uncertainties about the possibilities of  
79 measuring evolutionary rescue.

80 Recently, Diniz-Filho et al. (2019) applied a macroecological framework to estimate  
81 responses to evolutionary change and the likelihood of evolutionary rescue; they proposed the  
82  $H$  value (Haldanes) to estimate the evolutionary change required by species to maintain their  
83 populations in future environmental scenarios, giving a biological and evolutionary meaning  
84 to temperature variations that species will experience. According to the framework proposed  
85 by Diniz-Filho et al. (2019), the greater the variation in temperature between present and  
86 future, the greater the  $H$  value, and consequently, the more difficult it is for the species to  
87 experience an ER scenario. Likewise, the fewer generations the species can have until the  
88 future, the higher the  $H$ . In short, the smaller the temperature difference and the larger the  
89 number of generations, the more likely it is for evolutionary rescue to happen, and for a  
90 species to persist in the face of climate change.

91 WWF (2018) showed an average 60% decrease in vertebrate populations, and a  
92 quarter of all known mammals are currently threatened with extinction (IUCN, 2020). Within  
93 this group, the canids (family Canidae) is an excellent group to test the impacts of climate  
94 changes on future distributions, as they are distributed in all continents, except Antarctica  
95 (Sillero-Zubiri et al., 2004; Wang & Tedford, 2008), and because as medium-large mammals  
96 they are more prone to extinction than smaller species (Rija et al., 2020). Like other species,  
97 canids are affected by the consequences of urbanization and climate change: coyotes (*Canis*  
98 *latrans*) and red foxes (*Vulpes Vulpes*) have been observed in urban areas in North-America  
99 (Lombardi et al., 2017; Mueller et al., 2018; Poessel et al., 2013, 2017), while the red fox has

100 invaded a habitat in northern Europe that was previously occupied only by the arctic fox  
101 (*Vulpes lagopus*) (WWF, 2018). Understanding how canids are affected by changes in the  
102 landscape, and being able to predict their future distributions is essential to outline  
103 conservation strategies for different species.

104 Here we use climate-based ENMs to: 1) model the distribution of all canids under  
105 present climate conditions, 2) predict possible changes in Canidae distribution under climate  
106 change in the next 54 years (2075), and identify species at risk of losing some or all of their  
107 current range, but also assess if some species could enlarge it; and 3) identify which species  
108 are most likely to adapt to changing climatic conditions and therefore avoid the negative  
109 effects of temperature change.

110

## 111 **2 MATERIALS AND METHODS**

### 112 **2.1 Occurrence and environmental data**

113 Species occurrence data for all canids were taken from VertNet (Constable et al., 2010) and  
114 the Global Biodiversity Information Facility (GBIF, 2020) online databases. The number of  
115 occurrence points is shown in Tables S1, and cover all the known distribution of the 36  
116 species used here (which correspond to 100% of the living Canidae species). We spatially  
117 filtered the data using SDMToolbox 2.0 (Brown et al., 2017), in ArcGis 10.3.1  
118 (Environmental Systems Resource Institute, 2019), to remove duplicate occurrence points. As  
119 there are different classifications for the Canidae family in relation to the number of species  
120 (Bardeleben et al., 2005; Perini et al., 2010; Zrzavy & Ricánková, 2004), here we use the  
121 most recent canid phylogeny proposed by Porto et al. (2019) to define which species of  
122 Canidae ( $n = 36$  - Table S1) would be considered here to model their potential distributions.

123 For environmental variables, we downloaded a digital elevation model (DEM) (IUCN,  
124 2019) and the standard 19 Worldclim bioclimatic variables for the present and future (2075)  
125 (Hijmans et al., 2005). In addition, we used the distance to freshwater as a variable, which we  
126 measured using the Natural Earth River and lake maps, and the Euclidean distance tool in  
127 ArcGis. To clarify the environmental data we masked the variables and imported them into R  
128 4.0-2 (R Development Core Team, 2020) and tested for multicollinearity using variance  
129 inflation factor (VIF) tests with the package regclass 1.6 (Petrie, 2020) and pairwise plots.  
130 Highly correlated variables (VIF score  $> 10$  or Pearson correlation  $> 0.7$  respectively) were  
131 eliminated one at a time, starting with the variable(s) deemed to possess the least ecological  
132 relevance based on the VIF tests.

133

## 134 **2.2 Ecological niche modelling**

135 ENMs for the present were performed using the R package SDM 1.0-89 (Naimi & Araújo,  
136 2016). To model species' niches for the present, we generated 10.000 random background  
137 points within a mask equivalent to the species' known IUCN ranges, buffered to 220 km (or  
138 approximately two decimal degrees), producing a presence-absence matrix of species within  
139 defined grids cells (pixels). We built ensembles (objects with a weighted averaging over all  
140 predictions from several fitted models) of four different models: Maxent, Support Vector  
141 Machine (SVM), Random Forest (RF), and Boosted Regression Tree (BRT). For all models,  
142 we used 90% as training data and 10% were retained as test points. Models were only  
143 accepted if they had acceptable True Skill Statistic (TSS - calculated as the sum of specificity  
144 + sensitivity - 1) and Area Under the Curve (AUC) values (0.7 being the minimum accepted  
145 AUC, 0.6 the minimum TSS (Allouche et al., 2006)). We used both TSS and AUC to evaluate  
146 the models because they assign different weights depending on the sample size of the data  
147 used (Guisan et al., 2017), and hence we believe our results to be more robust if both criteria  
148 are met.

149 In order to verify whether the ENMs and IUCN polygons agree, we compared the  
150 current distribution maps of all species of canids available at IUCN against the maps created  
151 here through ENMs. IUCN maps were generated by minimum convex polygons, which  
152 represent the realized niche of the species, while the ENMs here bring a more detailed notion  
153 of their fundamental niche.

154 We modelled the future distribution of species based on the most pessimistic climate  
155 scenario for the year 2075 (RCP 8.5 - Representative Concentration Pathway) from IPCC  
156 (2007). We chose this scenario because it seems to have become the most realistic one over  
157 the last years, and can even be under-estimating future concentrations of atmospheric carbon  
158 (Christensen et al. (2018). RCP 8.5 assumes high global CO<sub>2</sub> concentration, a high rate of  
159 human population growth, and an increased use of energy and land. We used an ensemble of  
160 three General Circulation Models (GCMs): Access1.0 (exhibits a high skill score with regard  
161 to historical climate), HadGEM2 (has a good representation of extreme El Niño events), and  
162 MIROC5 (also has a good representation of extreme El Niño events, and represents all RCPs  
163 scenarios well). Maps of suitability (present/future) are shown on a continuous scale to better  
164 visualize the potential distribution of species.

165

## 166 **2.3 Evolutionary rescue calculations**

167  $H$  values were calculated for each of the 36 canids to predict whether they can adapt to  
168 climate change and prevent the loss of their habitat. We assumed that temperature is a  
169 representation of the species' niche (tolerance) most closely reflecting climate change. For  
170 each species, changes in maximum temperature of the warmest month (Bio05) across the  
171 entire range were estimated, and the temperature change in each cell was calculated as the  
172 average of the future temperature (in the warmest month) minus the average of the present  
173 temperature (in the warmest month). Following Diniz-Filho et al. (2019),  $H$  values were  
174 calculated using:

$$H = \frac{\frac{Y_0 - Y_t}{Y_{sd}}}{g}$$

175 where  $Y_0$  is the mean temperature at the present,  $Y_t$  is the mean temperature at time  $t$  in the  
176 future,  $Y_{sd}$  is the standard deviation of the present temperature tolerance (assuming a constant  
177 variance between generations), and  $g$  is the number of generations between present and future.  
178 The generation lengths for all canid species was compiled from the Animal Diversity Web  
179 (ADW - Myers et al., 2018) and PanTHERIA (Jones et al., 2009) (Table S1). The higher the  
180 value of  $H$ , the greater the rate of evolutionary change needed for a species to experience ER,  
181 and consequently, the more difficult it is to maintain its population facing a climatic change  
182 scenario.

183 For the evolutionary rescue analyses, we used the threshold maps (binary) for each  
184 species, produced with the suitability maps because they show presence/absence values based  
185 on the specificity and sensitivity of the model (Liu et al., 2015).

186

## 187 **3 RESULTS**

### 188 **3.1 Ecological niche modelling**

189 All ENMs produced acceptable accuracy values for TSS and AUC. After testing highly  
190 correlated variables, only five were not excluded and were used to model canid niches, they  
191 are: distance to freshwater (DIST), the maximum temperature in the warmest month (Bio05),  
192 precipitation in the driest month (Bio14), elevation (DEM).

193 To check the reliability of the ENMs we compared their predictions on the present  
194 distributions with the actual current distributions according to IUCN polygons (realized niche)  
195 (Appendix - Figure S1 – S36). With the exception of a single species, *Canis lupus*, the

196 distribution polygons fall within the areas that the ENMs demonstrate to be suitable for the  
197 species to occupy (fundamental niche). Species richness maps for the present generated by  
198 ENMs (Figure 1) and by polygons (Figure S37) show very similar patterns of species overlap,  
199 generally maintaining the same hotspot locations in the Middle East + Northeast Africa region  
200 and western part of the USA. However, there is an exception: the richness map based on  
201 polygons shows the presence of *Canis lupus* in the Middle East region towards India, but this  
202 is not predicted by the ENMs (see Discussion). Because of the high similarity our ENM  
203 predictions seem highly reliable, and we therefore compare our future ENM predictions with  
204 ENM predictions for the present, as they are better comparable (both describe the  
205 fundamental niche).

206 Our models indicated that 27 species were predicted to experience range contractions  
207 under climate change, while 9 were predicted to expand in range overall (Table S2). In all  
208 three Canidae clades (wolves, foxes, and South-American canids), we find that most species  
209 will contract their ranges, and a few will expand their ranges (Figure S38A-S38C). We  
210 discuss them now in more detail.

211 The South-American canids (Figure S38C), *Atelocynus microtis*, *Lycalopex fulvipes*,  
212 and *Lycalopex sechurae* are predicted to see future climate suitability fall below their  
213 modelled threshold across their entire ranges (Table S2), losing a large part of their  
214 geographical distributions (Appendix - Figures S39, S40, and S41). In contrast, *Cerdocyon*  
215 *thous* is the only South-American canid that was predicted to have a considerable expansion  
216 in its geographical area under future conditions; moreover, the ENM predicts that *C. thous*  
217 will occupy areas within the Amazon Forest not inhabited before (Table S2, and also see  
218 Appendix - Figure S38C and Figure S42).

219 In the clade of wolves, *Canis latrans* and *Canis rufus* are probably going to lose a  
220 large part of their ranges in North America, while *Canis anthus* and *Canis lupus* are expected  
221 to increase their distributions, mainly in desert areas such as the Middle East, for both species,  
222 and the deserts in the USA for *C. lupus* (Table S2, and also see Appendix - Figure S38A,  
223 Figure S43, and Figure S44).

224 Some of the fox species are predicted to suffer severe losses in their ranges (Table S2  
225 and Figure S38B). Among them, *Urocyon littoralis* stands out: even though it is considered an  
226 endangered species at the moment, the ENMs predicted that *U. littoralis* will lose 28.6% of its  
227 (small) current distribution (Table S2). *Vulpes chama*, *Vulpes bengalensis*, and *Vulpes velox*  
228 also were predicted to have a considerable decrease in their geographical ranges. By contrast,  
229 *Vulpes corsac*, *Vulpes vulpes*, *Otocyon megalotis*, and *Urocyon cinereoargenteus* will



230 probably experience range expansions under future climatic conditions. In fact, the ENM  
231 predicted that *V. vulpes* will increase 5.7% of its distribution, inhabiting new areas such as the  
232 Middle East, Northern Canada, and Greenland (Appendix - Figure S45).

233 The richness map of the present (Figure 1) shows that the overlap of different species  
234 is very low around the planet. The map also points to two hotspot areas for canid diversity,  
235 one in the western part of the USA (Figure 1A), and another in the Middle East + Northeast  
236 Africa region (Figure 1B). The richness map for the future (Figure 2) shows that patterns of  
237 richness are predicted to change under future climatic conditions, where the main changes  
238 will be in the hotspot areas. The USA hotspot is predicted to reduce its area considerably due  
239 to the low species overlap in the future. By contrast, The Middle East + Northeast Africa  
240 hotspot is predicted to increase in size.

241 The ENMs indicated species that do not overlap currently will start to overlap in their  
242 distributions, and even those that overlap in only small parts of their distributions will suffer  
243 considerable increases in their overlap areas. In South America, *C. thous* is predicted to  
244 invade areas where only *A. microtis* and *Speothos venaticus* live, inside the Amazon rainforest  
245 (Appendix - Figures S39, S42, and S46). With the great expansion of *V. vulpes*' geographical  
246 distribution, this species is expected to overlap its area with *V. bengalensis*, *Vulpes rueppellii*,  
247 and *Vulpes zerda* (Appendix - Figures S45, S47, S48, and S49). In addition, *C. lupus* will  
248 probably overlap in areas occupied before only by *V. bengalensis*, *V. rueppellii*, *V. zerda*, and  
249 *Canis aureus* (Appendix - Figures S44, S47, S48, S49, and S50).

250

### 251 **3.2 Evolutionary rescue**

252 Most of canids presented evolutionary rates around 0.01 Haldanes (Table S2). The highest *H*  
253 value was found for *A. microtis* ( $H = 0.047$  Haldanes), and the lowest value was from  
254 *Lycalopex griseus* ( $H = 0.004$  Haldanes) (Table S2).

255 We found a significant weak negative correlation between change in range size and  
256 evolutionary potential: species that are predicted to undergo more habitat loss according to the  
257 ENMs have a lower potential for ER, according to the *H* values (Figure 3).

258

## 259 **4 DISCUSSION**

260 We applied models of evolutionary rescue, using temperature and generation cycle as intrinsic  
261 characteristics of canids, together with ENMs to understand the magnitude of the effects of  
262 climate change on Canidae distribution. Predictions for the future by ENMs, derived from the



263 IPCC worst climate change scenario, suggested that climate change will affect canids in  
264 distinct ways, where some species will expand or maintain their distributions, while most will  
265 suffer a large reduction in their suitable areas. Furthermore, the calculated Haldanes suggest  
266 that for some species it will be more difficult to keep up with the pace of temperature changes  
267 than others. We detected a weak negative correlation between habitat loss and potential for  
268 evolutionary rescue, indicating that the species with higher potential to evolutionary rescue  
269 are the ones that gain area or lose only a small part of their future distributions, while the ones  
270 which are going to lose a large part of their future distribution will need a higher evolutionary  
271 change to maintain their populations. *Atelocynus microtis*, for example, is predicted to lose  
272 about half of its potential distribution and has the highest  $H$  value among canids ( $H = 0.047$   
273 Haldanes). This negative correlation is to be expected because larger differences between  
274 present and future temperatures will increase  $H$  and will also make it more likely that range  
275 sizes will change.

276 Our results suggest that global warming will be devastating to the Canidae family as a  
277 whole. However, even in this pessimistic scenario, some species have the potential to benefit  
278 from future conditions and considerably expand their geographic distributions. In general,  
279 several taxa, including mammals, birds, amphibians, and reptiles, are expected to experience  
280 drastic range reductions (Araújo & New, 2007; Diniz-filho et al., 2009; Hidasi-neto et al.,  
281 2019; Lawler et al., 2009; Maiorano et al., 2011; Peterson et al., 2002). In a scenario such as  
282 this, several communities will probably lose phylogenetic and functional diversity (Davis et  
283 al., 1998; Hidasi-neto et al., 2019), and considering the number of interactions that will be lost  
284 within these areas, the ecological impacts due to indirect effects may be stronger than the  
285 direct effects of climate change on species' distributions (Davis et al., 1998; Peterson et al.,  
286 2002). Carnivores, through population regulation, can promote the coexistence of several  
287 species by reducing interspecific competition (Paine, 1966). Because canids, being carnivores,  
288 hunt distinct animals, they end up regulating the population dynamics of their prey, which is  
289 an important factor for maintaining biodiversity (Sanders et al., 2013; Sanders & van Veen,  
290 2012).

291 In South-America, there is a very concerning situation, where *A. microtis* will  
292 probably contract its range substantially and undergo fragmentation of its distribution within  
293 the Amazon Forest, while *C. thous* will expand. *A. microtis* is ecologically restricted to very  
294 specific resources and conditions (Sillero-Zubiri et al., 2004; Wilson & Mittermeier, 2009).  
295 By contrast, *C. thous* is a generalist species with a large distribution across South-America  
296 (Sillero-Zubiri et al., 2004). Currently, the status of *A. microtis* is “Near Threatened” (IUCN,

297 2019), but considering the climate change effects shown here, and the fact that the Amazon  
298 Forest has been suffering with wildfires and an intense deforestation process over the last  
299 decades (Exbrayat et al., 2017; INPE, 2019), *A. microtis* is probably experiencing a  
300 substantial habitat loss followed by a very likely increase in the number of direct encounters  
301 with another competitor. Thus, we suggest that its “Near Threatened” status must change, at  
302 least, to “Vulnerable”.

303 A similar situation applies to *V. vulpes* and *V. lagopus*. The first one has a wide  
304 distribution over the northern hemisphere, while the second is restricted to areas covered by  
305 snow around The North Pole, but both species overlap in the Tundra of North America and  
306 Eurasia (Hersteinsson & Macdonald, 1992; Sillero-Zubiri et al., 2004). Over the past few  
307 years there has been an increase in the number of encounters between the two species due to  
308 the warming temperatures that are gradually melting the Arctic ice cap, reducing the available  
309 area for *V. lagopus*, but making it possible for *V. vulpes* to expand its distribution to the north  
310 into arctic tundra in Eurasia and North America (Gallant et al., 2012). This reality is even  
311 more aggravating in the future scenario shown here, considering the large area loss by *V.*  
312 *lagopus* to *V. vulpes* (Figure S51). However, Gallant et al. (2012) suggested that food scarcity  
313 in these areas seems to explain the dynamics of the geographical overlap of both two species  
314 better than climate warming. Nevertheless, the effects of area loss must still be taken into  
315 account to outline conservation strategies for *V. lagopus*.

316 The loss of species has severe impacts on the functioning of ecosystems (Cardinale et  
317 al., 2012; Kennedy et al., 2002; Lyons & Schwartz, 2001; Pimm et al., 2014). In general,  
318 reductions in the number of species (functional groups) decrease the efficiency of  
319 communities to capture resources, and convert these into biomass (Balvanera et al., 2006;  
320 Cardinale et al., 2012; Quijas et al., 2010). Our niche models detected two major richness  
321 hotspots for Canidae: one in the Middle East + North East Africa and one in North America.  
322 The former is predicted to undergo a small expansion, mainly due to the range expansion of  
323 *C. lupus*, *C. anthus*, and *V. vulpes* over these areas, and the capacity of *C. lupus* and *V. vulpes*  
324 to live around urban areas (Sillero-Zubiri et al., 2004; Wang & Tedford, 2008; Wilson &  
325 Mittermeier, 2009). This capacity can also explain the wide distribution of both species  
326 around the world. The other hotspot area, in North America, is expected to experience a  
327 considerable area reduction. This can be explained by the small portion of this hotspot that is  
328 within protected areas in the USA, according to Brum et al. (2017).

329 Here, the ENMs for all canids (appendix) agreed well with the current distribution of  
330 canids, suggesting that the methodology we applied is reliable to assess the impacts of climate

331 change on Canidae, taking into account their main niche dimensions. *Canis lupus* is the only  
332 species for which the ENMs for the present did not encompass the entire distribution  
333 presented by its polygon, because it is not predicted to occur in the Middle East. This might  
334 be explained by the presence of a single population found in that region, which results in the  
335 distribution of the species to be extended to areas that are not suitable. The IUCN distribution  
336 maps are widely used in several studies for different purposes (Kyne et al., 2020; Porto et al.,  
337 2021; Shier, 2015; Zhang et al., 2019), and are defined as the area within the outermost limits  
338 of known occurrence for a species, but this area is not an estimate of the extent of occupied  
339 habitat, it only measures the general extension of the localities in which the species is found  
340 (Gaston & Fuller, 2009). Thus, polygons are highly susceptible to sampling biases.  
341 Nevertheless, it is important to point out that ENMs for the future suggest that *Canis lupus*  
342 will expand its distribution to the Middle East, which could be an indication that this region is  
343 already becoming suitable for the species.

344 Our methods assumed that the prey of the Canidae will respond to environmental  
345 changes at the same rate as their (apex or medium-level) predators. Indeed, climate change  
346 has already been observed to have wide-ranging trophic effects (Gilman et al., 2010), and  
347 physiological and behavioral effects in other species (Parmesan, 2006). Modelling the effect  
348 of climate change on species' communities and trophic interactions has proven extremely  
349 difficult, but these interactions can have serious impacts on species distributions (Sanders et  
350 al., 2013; Sanders & van Veen, 2012). These trophic interactions may be further disrupted by  
351 invasive species, the spread of which could be accelerated by climate change (Hellmann et al.,  
352 2008).

353 Looking at the  $H$  values, two cases are very concerning. *Atelocynus microtis* and  
354 *Chrysocyon brachyurus* present higher  $H$  values compared to other canids (0.047 and 0.027,  
355 respectively), and based on Diniz-Filho et al. (2019), these species have a lower potential for  
356 evolutionary rescue. Although  $H$  values and ENMs try to elucidate the future of species, they  
357 have distinct points of view about the effects of climate change on canids, and therefore  
358 should not be compared. However, these two approaches can shed light on Canidae responses  
359 to the future of the planet.  $H$  values suggest that some species have less potential than others  
360 to adapt fast enough to temperature changes, but ENMs indicate that some of them may  
361 increase their range, because more suitable habitats will become available for them due to  
362 climate change. Thus, in these cases ecological processes seem to prevail over evolutionary  
363 ones.

364           Unfortunately, very little is known about ER in nature to compare with our findings,  
365 mostly because the idea that evolution may influence the persistence of a population facing a  
366 rapid environmental change is very recent. Nevertheless, Diniz-Filho et al. (2019) already  
367 suggested that the use of the ER approach for wider geographical areas might not be that  
368 simple. They suggested that in order to obtain a standard temperature deviation, the real  
369 temperature tolerances must be known. However, no lab values were available for any wild  
370 canid, meaning that only values obtained from range estimations and ENMs could be used.  
371 Nonetheless, both may underestimate a species' true temperature tolerance. For example,  
372 while we have extracted values of mean Bio05 (maximum temperature in the warmest  
373 month), sometimes these values are well below the highest value seen within a species range.

374           The biogeographic patterns observed in this study may provide useful information for  
375 assessing how canids are distributed in the present over the planet, being an alternative to the  
376 distribution polygons provided by IUCN (2020). Climate change is projected to play an  
377 essential role in the geographical distribution of canids, so our predictions can be used to  
378 identify key areas for conservation strategies. This should receive special attention because as  
379 we showed, most of the Canidae hotspot regions are not located within protected areas.

380

## 381 **DECLARATION SECTION**

### 382 **Ethics approval and consent to participate**

383 Not applicable.

384

### 385 **Consent for publication**

386 Not applicable.

387

### 388 **Availability of data and material**

389 All data generated or analyzed during this study are included in this article and in the supplementary files.

390

### 391 **Competing interests**

392 We have no competing interests.

393

### 394 **Funding**

395 L.M.V.P. is supported by CAPES and by the University of Groningen. R. M. is supported by UFRGS,  
396 FAPERGS, and CNPq (406497/2018-4).

397

## 398 Authors' contributions

399 L.M.V.P. and D.B. conceived and designed the study and analyses. L.M.V.P. and D.B. performed the analyses.  
400 L.M.V.P. and D. B. wrote the first draft of the manuscript. R.S.E. and R.M. commented on the methods and  
401 contributed to substantial revisions on the draft.

402

## 403 REFERENCES

- 404 Allouche, O., Tsoar, A., & Kadmon, R. (2006). Assessing the accuracy of species distribution models:  
405 prevalence, kappa and the true skill statistic (TSS). *Journal of Applied Ecology*, *43*(6), 1223–1232.  
406 <https://doi.org/10.1111/j.1365-2664.2006.01214.x>
- 407 Araújo, M. B., Alagador, D., Cabeza, M., Nogués-Bravo, D., & Thuiller, W. (2011). Climate change threatens  
408 European conservation areas. *Ecology Letters*, *14*(5), 484–492. [https://doi.org/10.1111/j.1461-](https://doi.org/10.1111/j.1461-0248.2011.01610.x)  
409 [0248.2011.01610.x](https://doi.org/10.1111/j.1461-0248.2011.01610.x)
- 410 Araújo, M. B., & New, M. (2007). Ensemble forecasting of species distributions. *Trends in Ecology and*  
411 *Evolution*, *22*(1), 42–47. <https://doi.org/10.1016/j.tree.2006.09.010>
- 412 Balvanera, P., Pfisterer, A. B., Buchmann, N., He, J.-S., Nakashizuka, T., Raffaelli, D., & Bernhard, S. (2006).  
413 Quantifying the evidence for biodiversity effects on ecosystem functioning and services. *Ecology Letters*,  
414 *9*, 1146–1156. <https://doi.org/10.1111/j.1461-0248.2006.00963.x>
- 415 Bardeleben, C., Moore, R. L., & Wayne, R. K. (2005). A molecular phylogeny of the Canidae based on six  
416 nuclear loci. *Molecular Phylogenetics and Evolution*, *37*(3), 815–831.  
417 <https://doi.org/10.1016/j.ympev.2005.07.019>
- 418 Bell, G. (2013). Evolutionary rescue and the limits of adaptation. *Philosophical Transactions of the Royal*  
419 *Society B: Biological Sciences*, *368*(1610), 1–6. <https://doi.org/10.1098/rstb.2012.0080>
- 420 Bellard, C., Bertelsmeier, C., Leadley, P., Thuiller, W., & Courchamp, F. (2012). Impacts of climate change on  
421 the future of biodiversity. *Ecology Letters*, *15*(4), 365–377. [https://doi.org/10.1111/j.1461-](https://doi.org/10.1111/j.1461-0248.2011.01736.x)  
422 [0248.2011.01736.x](https://doi.org/10.1111/j.1461-0248.2011.01736.x)
- 423 Brown, J. L., Bennett, J. R., & French, C. M. (2017). SDMtoolbox 2.0: The next generation Python-based GIS  
424 toolkit for landscape genetic, biogeographic and species distribution model analyses. *PeerJ*, *2017*(12).  
425 <https://doi.org/10.7717/peerj.4095>
- 426 Brum, F. T., Graham, C. H., Costa, G. C., Hedges, S. B., Penone, C., Radeloff, V. C., Rondinini, C., Loyola, R.,  
427 & Davidson, A. D. (2017). Global priorities for conservation across multiple dimensions of mammalian  
428 diversity. *Proceedings of the National Academy of Sciences of the United States of America*, *114*(29),  
429 7641–7646. <https://doi.org/10.1073/pnas.1706461114>
- 430 Butchart, S. H. M., Walpole, M., Collen, B., Van Strien, A., Scharlemann, J. P. W., Almond, R. E. A., Baillie, J.  
431 E. M., Bomhard, B., Brown, C., Bruno, J., Carpenter, K. E., Carr, G. M., Chanson, J., Chenery, A. M.,  
432 Csirke, J., Davidson, N. C., Dentener, F., Foster, M., Galli, A., ... Watson, R. (2010). Global biodiversity:  
433 Indicators of recent declines. *Science*, *328*(5982), 1164–1168. <https://doi.org/10.1126/science.1187512>
- 434 Cardinale, B. J., Duffy, J. E., Gonzalez, A., Hooper, D. U., Perrings, C., Venail, P., Narwani, A., MacE, G. M.,  
435 Tilman, D., Wardle, D. A., Kinzig, A. P., Daily, G. C., Loreau, M., Grace, J. B., Larigauderie, A.,  
436 Srivastava, D. S., & Naeem, S. (2012). Biodiversity loss and its impact on humanity. *Nature*, *486*(7401),  
437 59–67. <https://doi.org/10.1038/nature11148>
- 438 Catullo, G., Masi, M., Falcucci, A., Maiorano, L., Rondinini, C., & Boitani, L. (2008). A gap analysis of  
439 Southeast Asian mammals based on habitat suitability models. *Biological Conservation*, *141*(11), 2730–  
440 2744. <https://doi.org/10.1016/j.biocon.2008.08.019>
- 441 Ceballos, G., Ehrlich, P. R., Barnosky, A. D., García, A., Pringle, R. M., & Palmer, T. M. (2015). Accelerated  
442 modern human-induced species losses: Entering the sixth mass extinction. *Science Advances*, *1*(5), 9–13.  
443 <https://doi.org/10.1126/sciadv.1400253>

- 444 Christensen, P., Gillingham, K., & Nordhaus, W. (2018). Uncertainty in forecasts of long-run economic growth.  
445 *Proceedings of the National Academy of Sciences*, 115(21), 5409–5414.  
446 <https://doi.org/10.1073/pnas.1713628115>
- 447 Constable, H., Guralnick, R., Wieczorek, J., Spencer, C., Peterson, A. T., Bart, H., Bates, J., Cotter, G., Hanken,  
448 J., Moritz, C., Simmons, N., & Trueb, L. (2010). VertNet: A new model for biodiversity data sharing.  
449 *PLoS Biology*, 8(2), 1–4. <https://doi.org/10.1371/journal.pbio.1000309>
- 450 Davidson, A. D., Hamilton, M. J., Boyer, A. G., Brown, J. H., & Ceballos, G. (2009). Multiple ecological  
451 pathways to extinction in mammals. *Proceedings of the National Academy of Sciences of the United States*  
452 *of America*, 106(26), 10702–10705. <https://doi.org/10.1073/pnas.0901956106>
- 453 Davis, A. J., Jenkinson, L. S., & Lawton, J. H. (1998). Making mistakes when predicting shifts in species range  
454 in response to global warming. *Nature*, 391(February), 783–786.
- 455 Diniz-filho, A. F., Bini, L. M., Rangel, T. F., Loyola, R. D., Hof, C., Nogue, D., & Arau, M. B. (2009).  
456 *Partitioning and mapping uncertainties in ensembles of forecasts of species turnover under climate*  
457 *change. September*, 897–906. <https://doi.org/10.1111/j.1600-0587.2009.06196.x>
- 458 Diniz-Filho, J. A. F., Souza, K. S., Bini, L. M., Loyola, R., Dobrovolski, R., Rodrigues, J. F. M., Lima-Ribeiro,  
459 S., Terribile, L. C., Rangel, T. F., Bione, I., Freitas, R., Machado, I. F., Rocha, T., Lorini, M. L., Vale, M.  
460 M., Navas, C. A., Maciel, N. M., Villalobos, F., Olalla-Tarraga, M. A., & Gouveia, S. (2019). A  
461 macroecological approach to evolutionary rescue and adaptation to climate change. *Ecography*, 42(6),  
462 1124–1141. <https://doi.org/10.1111/ecog.04264>
- 463 Ehrlén, J., & Morris, W. F. (2015). Predicting changes in the distribution and abundance of species under  
464 environmental change. *Ecology Letters*, 18(3), 303–314. <https://doi.org/10.1111/ele.12410>
- 465 Elith, J., Kearney, M., & Phillips, S. (2010). The art of modelling range-shifting species. *Methods in Ecology*  
466 *and Evolution*, 1(4), 330–342. <https://doi.org/10.1111/j.2041-210x.2010.00036.x>
- 467 ESRI (Environmental Systems Resource Institute). (2019). *ArcGIS Desktop Help 10.2. Geostatistical Analyst*.  
468 <https://www.esri.com/en-us/home>
- 469 Exbrayat, J., Liu, Y. Y., & Williams, M. (2017). Impact of deforestation and climate on the Amazon Basin ' s  
470 above- ground biomass during 1993 – 2012. *Scientific Reports*, 7, 1–7. <https://doi.org/10.1038/s41598-017-15788-6>
- 472 Ferrière, R., Dieckmann, U., & Couvet, D. (2004). *Evolutionary Conservation Biology*. Cambridge University  
473 Press.
- 474 Fritz, S. A., & Purvis, A. (2010). Selectivity in Mammalian Extinction Risk and Threat Types: a New Measure  
475 of Phylogenetic Signal Strength in Binary Traits. *Conservation Biology*, 24(4), 1042–1051.
- 476 Gallant, D., Canada, P., Slough, B. G., Reid, D. G., Society, W. C., & Berteaux, D. (2012). *Arctic fox versus red*  
477 *fox in the warming Arctic: four decades of den surveys in north Yukon. May 2014*.  
478 <https://doi.org/10.1007/s00300-012-1181-8>
- 479 Gaston, K. J., & Fuller, R. A. (2009). The sizes of species' geographic ranges. *Journal of Applied Ecology*,  
480 46(1), 1–9. <https://doi.org/10.1111/j.1365-2664.2008.01596.x>
- 481 GBIF. (2020). *GBIF*. <https://www.gbif.org/>
- 482 Gilman, S. E., Urban, M. C., Tewksbury, J., Gilchrist, G. W., & Holt, R. D. (2010). A framework for community  
483 interactions under climate change. *Trends in Ecology and Evolution*, 25(6), 325–331.  
484 <https://doi.org/10.1016/j.tree.2010.03.002>
- 485 Goberna, M., Navarro-Cano, J. A., Valiente-Banuet, A., García, C., & Verdú, M. (2014). Abiotic stress tolerance  
486 and competition-related traits underlie phylogenetic clustering in soil bacterial communities. *Ecology*  
487 *Letters*, 17(10), 1191–1201. <https://doi.org/10.1111/ele.12341>
- 488 Gonzalez, A., Ronce, O., Ferriere, R., & Hochberg, M. E. (2012). Evolutionary rescue: An emerging focus at the  
489 intersection between ecology and evolution. *Philosophical Transactions of the Royal Society B: Biological*  
490 *Sciences*, 368(1610), 8. <https://doi.org/10.1098/rstb.2012.0404>
- 491 Guisan, A., & Thuiller, W. (2005). Predicting species distribution: Offering more than simple habitat models.



- 492 *Ecology Letters*, 8(9), 993–1009. <https://doi.org/10.1111/j.1461-0248.2005.00792.x>
- 493 Guisan, A., Thuiller, W., & Zimmermann, N. (2017). *Habitat Suitability and Distribution Models: with*  
494 *Applications in R*. Cambridge University Press. <https://doi.org/10.1017/9781139028271>
- 495 Hellmann, J. J., Byers, J. E., Bierwagen, B. G., & Dukes, J. S. (2008). Five potential consequences of climate  
496 change for invasive species. *Conservation Biology*, 22(3), 534–543. [https://doi.org/10.1111/j.1523-](https://doi.org/10.1111/j.1523-1739.2008.00951.x)  
497 1739.2008.00951.x
- 498 Hersteinsson, P., & Macdonald, D. W. (1992). Interspecific Competition and the Geographical Distribution of  
499 Red and Arctic Foxes *Vulpes Vulpes* and *Alopex lagopus*. *Oikos*, 64(3), 505–515.
- 500 Hidasi-neto, J., Caroline, D., Resende, F., Macedo, L. De, Valtuille, F., Dias, R., & Vinicius, M. (2019). Climate  
501 change will drive mammal species loss and biotic homogenization in the Cerrado Biodiversity Hotspot.  
502 *Perspectives in Ecology and Conservation*, 17(2), 57–63. <https://doi.org/10.1016/j.pecon.2019.02.001>
- 503 Hijmans, R. J., Cameron, S. E., Parra, J. L., Jones, P. G., & Jarvis, A. (2005). Very high resolution interpolated  
504 climate surfaces for global land areas. *International Journal of Climatology*, 25(15), 1965–1978.  
505 <https://doi.org/10.1002/joc.1276>
- 506 INPE. (2019). *INSTITUTO NACIONAL DE PESQUISAS ESPACIAIS*. <http://terrabrasilis.dpi.inpe.br/downloads/>
- 507 IPCC. (2007). *Climate change the physical science basis. Contribution of Working Group I to the Fourth*  
508 *Assessment Report of the Intergovernmental Panel on Climate Change*. Cambridge University Press.
- 509 IUCN. (2019). *The IUCN Red List of Threatened Species. Version 2019-2*. <http://www.iucnredlist.org>
- 510 IUCN. (2020). *The IUCN Red List of Threatened Species*.
- 511 Jones, K. E., Bielby, J., Cardillo, M., Fritz, S. A., O'Dell, J., Orme, C. D. L., Safi, K., Sechrest, W., Boakes, E.  
512 H., Carbone, C., Connolly, C., Cutts, M. J., Foster, J. K., Grenyer, R., Habib, M., Plaster, C. A., Price, S.  
513 A., Rigby, E. A., Rist, J., ... Purvis, A. (2009). PanTHERIA: a species-level database of life history,  
514 ecology, and geography of extant and recently extinct mammals. *Ecology*, 90(9), 2648–2648.  
515 <https://doi.org/10.1890/08-1494.1>
- 516 Kennedy, T. A., Naeem, S., Howe, K. M., Knops, J. M. H., Tilman, D., & Reich, P. (2002). Biodiversity as a  
517 barrier to ecological invasion Biodiversity as a barrier to ecological invasion. *Nature*, 417, 10–13.  
518 <https://doi.org/10.1038/nature00776>
- 519 Kortsch, S., Primicerio, R., Fossheim, M., Dolgov, A. V., & Aschan, M. (2015). Climate change alters the  
520 structure of arctic marine food webs due to poleward shifts of boreal generalists. *Proceedings of the Royal*  
521 *Society B: Biological Sciences*, 282, 9.
- 522 Kyne, P. M., Jabado, R. W., Rigby, C. L., Dharmadi, Gore, M. A., Pollock, C. M., Herman, K. B., Cheok, J.,  
523 Ebert, D. A., Simpfendorfer, C. A., & Dulvy, N. K. (2020). The thin edge of the wedge: Extremely high  
524 extinction risk in wedgefishes and giant guitarfishes. *Aquatic Conservation: Marine and Freshwater*  
525 *Ecosystems*, 30(7), 1337–1361. <https://doi.org/10.1002/aqc.3331>
- 526 Lawler, J. J., Shafer, S. L., White, D., Kareiva, P., Maurer, E. P., Blaustein, A. R., & Bartlein, P. J. (2009).  
527 Projected climate-induced faunal change in the Western Hemisphere. *Ecology*, 90(3), 588–597.
- 528 Liu, C., Newell, G., & White, M. (2015). On the selection of thresholds for predicting species occurrence with  
529 presence-only data. *Ecology and Evolution*, 6(1), 337–348. <https://doi.org/10.1002/ece3.1878>
- 530 Lombardi, J. V., Comer, C. E., Scognamillo, D. G., & Conway, W. C. (2017). Coyote, fox, and bobcat response  
531 to anthropogenic and natural landscape features in a small urban area. *Urban Ecosystems*, 20(6), 1239–  
532 1248. <https://doi.org/10.1007/s11252-017-0676-z>
- 533 Lyons, K. G., & Schwartz, M. W. (2001). Rare species loss alters ecosystem function ± invasion resistance.  
534 *Ecology Letters*, 4, 358–365.
- 535 Maiorano, L., Falcucci, A., Zimmermann, N. E., Psomas, A., Pottier, J., Baisero, D., Rondinini, C., Guisan, A.,  
536 & Boitani, L. (2011). The future of terrestrial mammals in the Mediterranean basin under climate change.  
537 *Philosophical Transactions of the Royal Society B*, 366, 2681–2692.  
538 <https://doi.org/10.1098/rstb.2011.0121>



- 539 Marino, J., Bennett, M., Cossios, D., Iriarte, A., Lucherini, M., Pliscoff, P., Sillero-Zubiri, C., Villalba, L., &  
540 Walker, S. (2011). Bioclimatic constraints to Andean cat distribution: A modelling application for rare  
541 species. *Diversity and Distributions*, 17(2), 311–322. <https://doi.org/10.1111/j.1472-4642.2011.00744.x>
- 542 May, R. M., & Lawton, J. H. (1995). Assessing extinction rates. In R. M. May & J. H. Lawton (Eds.), *Extinction*  
543 *Rates* (pp. 1–24). Oxford University Press.
- 544 Moor, H., Hylander, K., & Norberg, J. (2015). Predicting climate change effects on wetland ecosystem services  
545 using species distribution modeling and plant functional traits. *Ambio*, 44(1), 113–126.  
546 <https://doi.org/10.1007/s13280-014-0593-9>
- 547 Mueller, M. A., Drake, D., & Allen, M. L. (2018). Coexistence of coyotes (*Canis latrans*) and red foxes (*Vulpes*  
548 *vulpes*) in an urban landscape. *PLoS ONE*, 13(1), 19.
- 549 Myers, P., Espinosa, R., Parr, C. S., Jones, T., Hammond, G. S., & Dewey, T. A. (2018). *The Animal Diversity*  
550 *Web*.
- 551 Nadeau, C. P., Urban, M. C., & Bridle, J. R. (2017). Coarse climate change projections for species living in a  
552 fine-scaled world. *Global Change Biology*, 23(1), 12–24. <https://doi.org/10.1111/gcb.13475>
- 553 Naimi, B., & Araújo, M. B. (2016). sdm: a reproducible and extensible R platform for species distribution  
554 modelling. *Ecography*, 29, 368–375. <https://doi.org/10.1111/ecog.01881>
- 555 Norberg, J., Urban, M. C., Vellend, M., Klausmeier, C. A., & Loeuille, N. (2012). Eco-evolutionary responses of  
556 biodiversity to climate change. *Nature Climate Change*, 2(10), 747–751.  
557 <https://doi.org/10.1038/nclimate1588>
- 558 Paine, R. T. (1966). Food Web Complexity and Species Diversity. *The American Naturalist*, 100(910), 65–75.
- 559 Parmesan, C. (2006). Ecological and evolutionary responses to recent climate change. *Annual Review of*  
560 *Ecology, Evolution, and Systematics*, 37, 637–669.  
561 <https://doi.org/10.1146/annurev.ecolsys.37.091305.110100>
- 562 Parmesan, C., & Yohe, G. (2003). A globally coherent fingerprint of climate change impacts across natural  
563 systems. *Nature*, 421, 37–42.
- 564 Pecl, G. T., Araújo, M. B., Bell, J. D., Blanchard, J., Bonebrake, T. C., Chen, I. C., Clark, T. D., Colwell, R. K.,  
565 Danielsen, F., Evengård, B., Falconi, L., Ferrier, S., Frusher, S., Garcia, R. A., Griffis, R. B., Hobday, A.  
566 J., Janion-Scheepers, C., Jarzyna, M. A., Jennings, S., ... Williams, S. E. (2017). Biodiversity  
567 redistribution under climate change: Impacts on ecosystems and human well-being. *Science*, 355(6332).  
568 <https://doi.org/10.1126/science.aai9214>
- 569 Perini, F. A., Russo, C. A. M., & Schrago, C. G. (2010). The evolution of South American endemic canids: A  
570 history of rapid diversification and morphological parallelism. *Journal of Evolutionary Biology*, 23(2),  
571 311–322. <https://doi.org/10.1111/j.1420-9101.2009.01901.x>
- 572 Peterson, A. T., Ortega-huerta, M. A., Bartley, J., Sa, V., & Stockwell, D. R. B. (2002). Future projections for  
573 Mexican faunas under global climate change scenarios. *Nature*, 416(April), 164–166.
- 574 Petrie, A. (2020). *R package regclass* (1.6). <https://www.rdocumentation.org/packages/regclass/versions/1.6>
- 575 Pimm, S. L., Jenkins, C. N., Abell, R., Brooks, T. M., Gittleman, J. L., Joppa, L. N., Raven, P. H., Roberts, C.  
576 M., & Sexton, J. O. (2014). The biodiversity of species and their rates of extinction, distribution, and  
577 protection. *Science*, 344(6187), 987–997. <https://doi.org/10.1126/science.1246752>
- 578 Pitchers, W., Wolf, J. B., Tregenza, T., Hunt, J., Dworkin, I., & Hunt, J. (2014). Evolutionary rates for  
579 multivariate traits: the role of selection and genetic variation. *Philosophical Transactions of the Royal*  
580 *Society B*, 19(369), 13. <https://doi.org/10.5061/dryad.g4t8c>
- 581 Poessel, S. A., Breck, S. W., Teel, T. L., Shwiff, S., Crooks, K. R., & Angeloni, L. (2013). Patterns of human–  
582 coyote conflicts in the Denver Metropolitan Area. *The Journal of Wildlife Management*, 77, 297–305.
- 583 Poessel, S. A., Gese, E. M., & Young, J. K. (2017). Environmental factors influencing the occurrence of coyotes  
584 and conflicts in urban areas. *Landscape and Urban Planning*, 157, 259–269.  
585 <https://doi.org/10.1016/j.landurbplan.2016.05.022>

- 586 Porto, L. M. Vi., Maestri, R., & Duarte, L. D. S. (2019). Evolutionary relationships among life-history traits in  
587 Caninae (Mammalia: Carnivora). *Biological Journal of the Linnean Society*, 128(2), 311–322.
- 588 Porto, Lucas M.V., Etienne, R. S., & Maestri, R. (2021). Explosive diversification following continental  
589 colonizations by canids. *Preprint: Doi: <https://doi.org/10.1101/2021.01.08.425986>*.
- 590 Quijas, S., Schmid, B., & Balvanera, P. (2010). Plant diversity enhances provision of ecosystem services: A  
591 new synthesis. *Basic and Applied Ecology*, 11(7), 582–593. <https://doi.org/10.1016/j.baae.2010.06.009>
- 592 R Development Core Team. (2020). *R: A Language and Environment for Statistical Computing*. R Foundation  
593 for Statistical Computing. Vienna, Austria. (4.0.2).
- 594 Rheingantz, M. L., de Menezes, J. F. S., & de Thoisy, B. (2014). Defining Neotropical otter *Lontra longicaudis*  
595 distribution, conservation priorities and ecological frontiers. *Tropical Conservation Science*, 7(2), 214–  
596 229. <https://doi.org/10.1177/194008291400700204>
- 597 Rija, A. A., Critchlow, R., Thomas, C. D., & Beale, C. M. (2020). Global extent and drivers of mammal  
598 population declines in protected areas under illegal hunting pressure. *PLOS ONE*, 15(8), e0227163.  
599 <https://doi.org/10.1371/journal.pone.0227163>
- 600 Sanders, D., Sutter, L., & van Veen, F. J. F. (2013). The loss of indirect interactions leads to cascading  
601 extinctions of carnivores. *Ecology Letters*, 16(5), 664–669. <https://doi.org/10.1111/ele.12096>
- 602 Sanders, D., & van Veen, F. J. F. (2012). Indirect commensalism promotes persistence of secondary consumer  
603 species. *Biology Letters*, 8, 960–963.
- 604 Santos, H., Rodrigues, L., Jones, G., & Rebelo, H. (2013). Using species distribution modelling to predict bat  
605 fatality risk at wind farms. *Biological Conservation*, 157, 178–186.  
606 <https://doi.org/10.1016/j.biocon.2012.06.017>
- 607 Shier, D. M. (2015). Developing a standard for evaluating reintroduction success using IUCN Red List indices.  
608 *Animal Conservation*, 18(5), 411–412. <https://doi.org/10.1111/acv.12242>
- 609 Sillero-Zubiri, C., Hoffmann, M., & Macdonald, D. (2004). *Canids: Foxes, Wolves, Jackals and Dogs*.  
610 Information Press, Oxford.
- 611 Sobral-Souza, T., Vancine, M. H., Ribeiro, M. C., & Lima-Ribeiro, M. S. (2018). Efficiency of protected areas  
612 in Amazon and Atlantic Forest conservation: A spatio-temporal view. *Acta Oecologica*, 87(July 2017), 1–  
613 7. <https://doi.org/10.1016/j.actao.2018.01.001>
- 614 Synes, N. W., & Osborne, P. E. (2011). Choice of predictor variables as a source of uncertainty in continental-  
615 scale species distribution modelling under climate change. *Global Ecology and Biogeography*, 20(6), 904–  
616 914. <https://doi.org/10.1111/j.1466-8238.2010.00635.x>
- 617 van Eldijk, T. J. B., Bisschop, K., & Etienne, R. S. (2020). Uniting Community Ecology and Evolutionary  
618 Rescue Theory: Community-Wide Rescue Leads to a Rapid Loss of Rare Species. *Frontiers in Ecology  
619 and Evolution*, 8. <https://doi.org/10.3389/fevo.2020.552268>
- 620 Wang, X., & Tedford, R. (2008). *Dogs: Their Fossil Relatives and Evolutionary History*. (1st ed.). Columbia  
621 University Press.
- 622 Wilson, E., & Mittermeier, A. (2009). *Handbook of Mammals of the World: Carnivores*. Lynx Edicions.
- 623 Woodward, G., Perkins, D. M., & Brown, L. E. (2010). Climate change and freshwater ecosystems: Impacts  
624 across multiple levels of organization. *Philosophical Transactions of the Royal Society B: Biological  
625 Sciences*, 365(1549), 2093–2106. <https://doi.org/10.1098/rstb.2010.0055>
- 626 WWF. (2018). *Living Planet Report - 2018: Aiming Higher*. (M. Grooten & R. E. A. Almond (eds.)). WWF.
- 627 Zhang, L., Ameca, E. I., Cowlshaw, G., Pettorelli, N., Foden, W., & Mace, G. M. (2019). Global assessment of  
628 primate vulnerability to extreme climatic events. *Nature Climate Change*, 9(7), 554–561.  
629 <https://doi.org/10.1038/s41558-019-0508-7>
- 630 Zrzavy, J., & Riečánková, V. (2004). Phylogeny of Recent Canidae (Mammalia, Carnivora): relative reliability  
631 and utility of morphological and molecular datasets. *Zoologica Scripta*, 33(4), 311–333.

632

633 **FIGURE LIST**

634

635

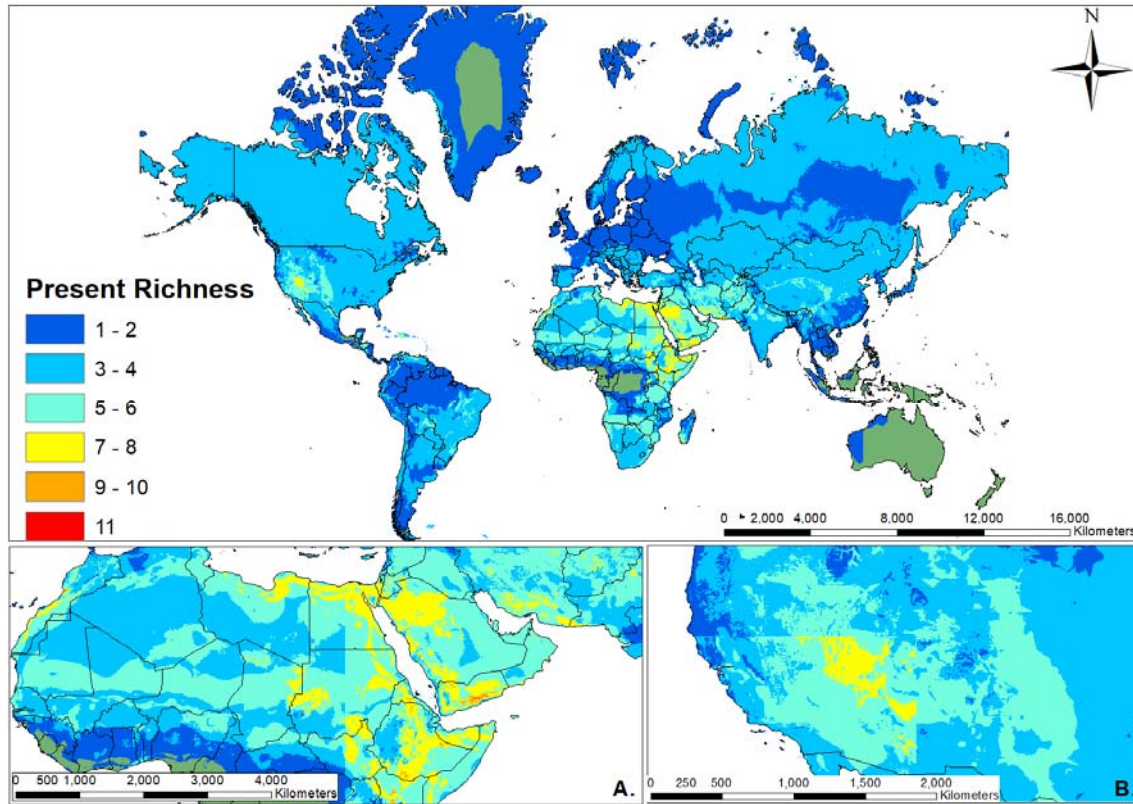

636

637 **FIGURE 1** Species richness map of Canidae for the present produced by ENM. The richest  
638 areas (hotspots) were identified in the Middle East + Northeast Africa region (A) and western  
639 part of the USA (B). The legend on the left shows the number of overlapping species.

640

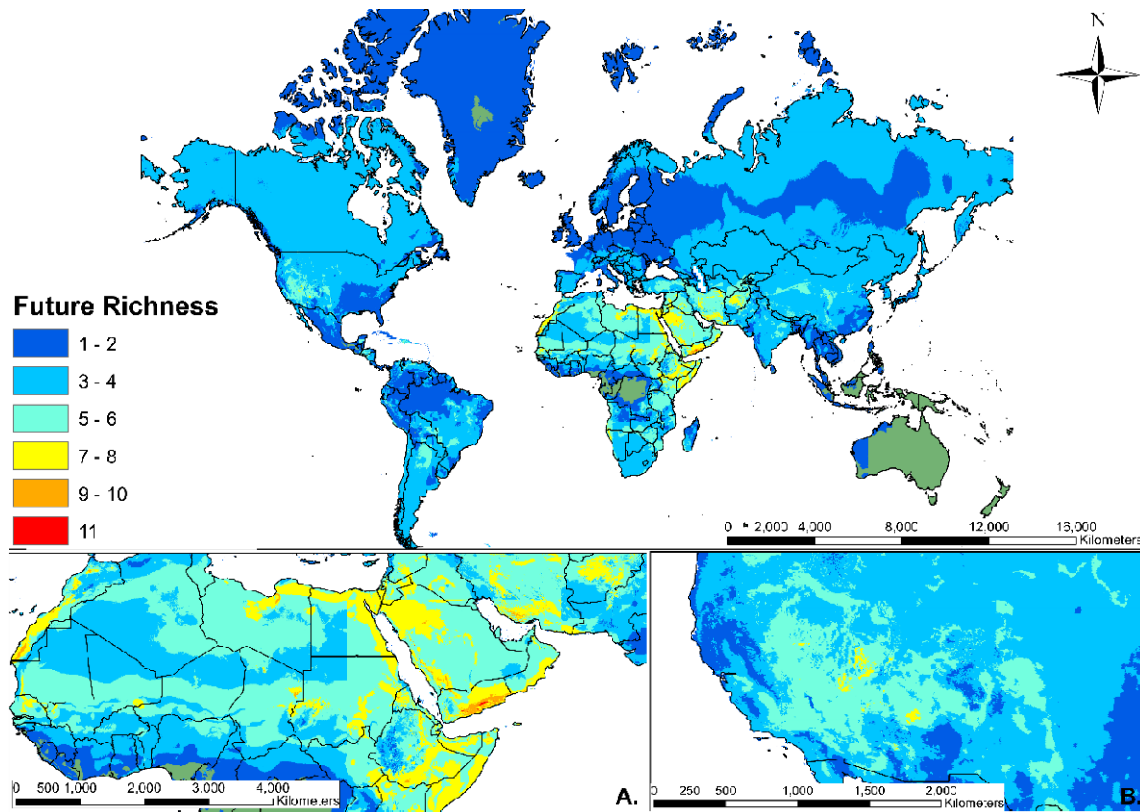

641

642 **FIGURE 2** Species richness map of Canidae under future climate conditions produced by  
643 ENM. The richest areas (hotspots) were identified in the Middle East + Northeast Africa  
644 region (A) and western part of the USA (B). The legend on the left shows the number of  
645 overlapping species.

646

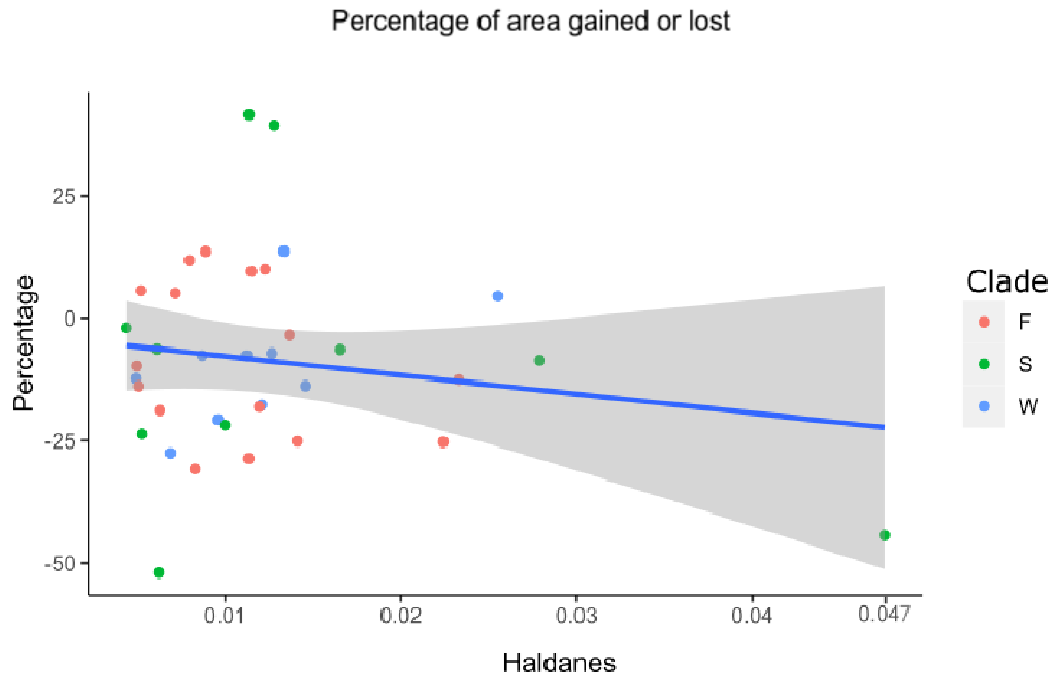

647

648 **FIGURE 3** Plot representing the relationship between the percentage of area gained or lost by  
649 canids in relation to  $H$  values. The higher the  $H$  value, the lower the likelihood of evolutionary  
650 rescue. Red, green, and blue dots are species from the clades of foxes, South-American  
651 canids, and wolves, respectively.  $R^2 = -0.187$  ( $P < 0.05$ ).

652

653

654

655

656

657

658

659

660

661

662

663

664 **SUPPLEMENTARY TEXT: TABLE LIST**

665 **TABLE S1** List of the 36 species of Canidae included in our study. Age of sexual maturity of  
 666 females (years), the number of generations until 2075, the number of occurrence points for each  
 667 species, and the source of the original description are indicated here.

| Species                         | Sexual maturity of females | Number of generations | Number of occurrence points | Descriptor              |
|---------------------------------|----------------------------|-----------------------|-----------------------------|-------------------------|
| <i>Canis adustus</i>            | 0.75                       | 100                   | 1.028                       | Sundevall, 1847         |
| <i>Canis aureus</i>             | 1                          | 75                    | 2.769                       | Linnaeus, 1758          |
| <i>Canis anthus</i>             | 1                          | 75                    | 1.536                       | Cuvier, 1820            |
| <i>Canis lupus</i>              | 2.5                        | 25                    | 8.490                       | Linnaeus, 1758          |
| <i>Canis latrans</i>            | 0.84                       | 89.3                  | 2.402                       | Say, 1823               |
| <i>Canis mesomelas</i>          | 0.84                       | 89.3                  | 645                         | Schreber, 1775          |
| <i>Canis rufus</i>              | 1                          | 75                    | 30                          | Audubon & Bachman, 1851 |
| <i>Canis simensis</i>           | 2                          | 37.5                  | 12                          | Rüppell, 1840           |
| <i>Cuon alpinus</i>             | 1                          | 75                    | 507                         | Pallas, 1811            |
| <i>Lycan pictus</i>             | 1.23                       | 60.4                  | 281                         | Temminck, 1820          |
| <i>Nyctereutes procyonoides</i> | 0.82                       | 91.5                  | 846                         | Gray, 1834              |
| <i>Vulpes bengalensis</i>       | 1.5                        | 50                    | 327                         | Shaw, 1800              |
| <i>Vulpes cana</i>              | 0.82                       | 91.5                  | 396                         | Blanford, 1877          |
| <i>Vulpes chama</i>             | 0.75                       | 100                   | 229                         | A. Smith, 1833          |
| <i>Vulpes corsac</i>            | 1.38                       | 54.3                  | 1.193                       | Linnaeus, 1768          |
| <i>Vulpes ferrilata</i>         | 1.15                       | 65.2                  | 264                         | Hodgson, 1842           |
| <i>Vulpes macrotis</i>          | 0.82                       | 91.5                  | 229                         | Merriam, 1888           |
| <i>Vulpes pallida</i>           | 1                          | 75                    | 406                         | Cretzschmar, 1826       |
| <i>Vulpes rueppellii</i>        | 1                          | 75                    | 1.299                       | Schinz, 1825            |
| <i>Vulpes velox</i>             | 1                          | 75                    | 88                          | Say, 1823               |
| <i>Vulpes vulpes</i>            | 0.83                       | 90.4                  | 9.457                       | Linnaeus, 1758          |
| <i>Vulpes zerda</i>             | 0.49                       | 153.1                 | 850                         | Zimmermann, 1780        |
| <i>Vulpes lagopus</i>           | 0.83                       | 90.4                  | 3.468                       | Linnaeus, 1758          |
| <i>Urocyon cinereoargenteus</i> | 0.95                       | 78.7                  | 1.089                       | Schreber, 1775          |
| <i>Urocyon littoralis</i>       | 1                          | 75                    | 30                          | Baird, 1857             |
| <i>Otocyon megalotis</i>        | 0.61                       | 122.6                 | 515                         | Desmarest, 1822         |
| <i>Atelocynus microtis</i>      | 1                          | 75                    | 238                         | Sclater, 1883           |
| <i>Cerdocyon thous</i>          | 0.76                       | 98.7                  | 864                         | Linnaeus, 1766          |
| <i>Chrysocyon brachyurus</i>    | 2                          | 37.5                  | 457                         | Illiger, 1815           |
| <i>Lycalopex culpaeus</i>       | 1                          | 75                    | 345                         | Molina, 1782            |
| <i>Lycalopex fulvipes</i>       | 1                          | 75                    | 8                           | Martin, 1837            |
| <i>Lycalopex griseus</i>        | 1                          | 75                    | 255                         | Gray, 1837              |
| <i>Lycalopex gymnocercus</i>    | 1                          | 75                    | 312                         | G. Fischer, 1814        |
| <i>Lycalopex sechurae</i>       | 1                          | 75                    | 24                          | Thomas, 1900            |
| <i>Lycalopex vetulus</i>        | 1                          | 75                    | 183                         | Lund, 1842              |
| <i>Speothos venaticus</i>       | 0.83                       | 90.4                  | 1.076                       | Lund, 1842              |



668

669 **TABLE S2** Area difference in species distributions for present and future, showing expansion  
 670 or retraction of canids' geographical distributions. *H* values are also indicated.

| Species                         | Present area (Km <sup>2</sup> ) | Future area (Km <sup>2</sup> ) | <i>H</i> |
|---------------------------------|---------------------------------|--------------------------------|----------|
| <i>Atelocynus microtis</i>      | 4.379.627                       | 2.438.970                      | 0,047520 |
| <i>Canis anthus</i>             | 15.472.384                      | 17.583.018                     | 0,013342 |
| <i>Canis aureus</i>             | 3.448.559                       | 3.187.594                      | 0,008698 |
| <i>Canis latrans</i>            | 12.065.866                      | 8.749.988                      | 0,006891 |
| <i>Canis lupus</i>              | 55.058.863                      | 57.577.546                     | 0,02551  |
| <i>Canis mesomelas</i>          | 7.840.423                       | 6.214.900                      | 0,009592 |
| <i>Canis rufus</i>              | 1.858.413                       | 1.529.932                      | 0,012079 |
| <i>Canis simensis</i>           | 6.707.343                       | 6.227.124                      | 0,012671 |
| <i>Canis adustus</i>            | 12.577.073                      | 11.623.101                     | 0,011225 |
| <i>Cerdocyon thous</i>          | 7.224.726                       | 10.225.538                     | 0,011357 |
| <i>Chrysocyon brachyurus</i>    | 5.202.737                       | 4.755.462                      | 0,027895 |
| <i>Cuon alpinus</i>             | 7.757.856                       | 6.803.830                      | 0,004926 |
| <i>Lycalopex culpaeus</i>       | 3.121.231                       | 2.923.795                      | 0,006086 |
| <i>Lycalopex fulvipes</i>       | 126.236                         | 98.762                         | 0,009984 |
| <i>Lycalopex vetulus</i>        | 2.539.881                       | 2.040.550                      | 0,012808 |
| <i>Lycalopex griseus</i>        | 2.961.540                       | 2.903.216                      | 0,004344 |
| <i>Lycalopex gymnocercus</i>    | 3.354.884                       | 2.561.320                      | 0,005269 |
| <i>Lycalopex sechurae</i>       | 2.514.432                       | 1.209.669                      | 0,006207 |
| <i>Lycaon pictus</i>            | 8.445.869                       | 7.276.908                      | 0,014579 |
| <i>Nyctereutes procyonoides</i> | 7.413.459                       | 6.018.161                      | 0,006262 |
| <i>Otocyon megalotis</i>        | 8.251.366                       | 8.676.914                      | 0,007170 |
| <i>Speothos venaticus</i>       | 11.953.879                      | 11.185.765                     | 0,016549 |
| <i>Urocyon cinereoargenteus</i> | 8.757.468                       | 9.595.434                      | 0,011490 |
| <i>Urocyon littoralis</i>       | 200.615                         | 143.194                        | 0,011346 |
| <i>Vulpes bengalensis</i>       | 3.053.463                       | 2.287.423                      | 0,014108 |
| <i>Vulpes cana</i>              | 6.315.447                       | 5.439.834                      | 0,005072 |
| <i>Vulpes chama</i>             | 3.594.029                       | 2.487.370                      | 0,008272 |
| <i>Vulpes corsac</i>            | 13.114.501                      | 14.423.740                     | 0,012275 |
| <i>Vulpes ferrilata</i>         | 3.502.426                       | 3.977.712                      | 0,008895 |
| <i>Vulpes lagopus</i>           | 13.405.437                      | 12.101.093                     | 0,004969 |
| <i>Vulpes macrotis</i>          | 2.651.764                       | 2.171.680                      | 0,011933 |
| <i>Vulpes pallida</i>           | 5.164.447                       | 4.518.576                      | 0,023281 |
| <i>Vulpes velox</i>             | 1.360.294                       | 1.016.829                      | 0,022411 |
| <i>Vulpes vulpes</i>            | 64.415.599                      | 68.080.936                     | 0,005214 |
| <i>Vulpes zerda</i>             | 11.242.325                      | 12.574.885                     | 0,007949 |
| <i>Vulpes rueppellii</i>        | 14.074.266                      | 13.588.853                     | 0,013633 |

671

672



673

674 **SUPPLEMENTARY TEXT: FIGURE LIST**

675

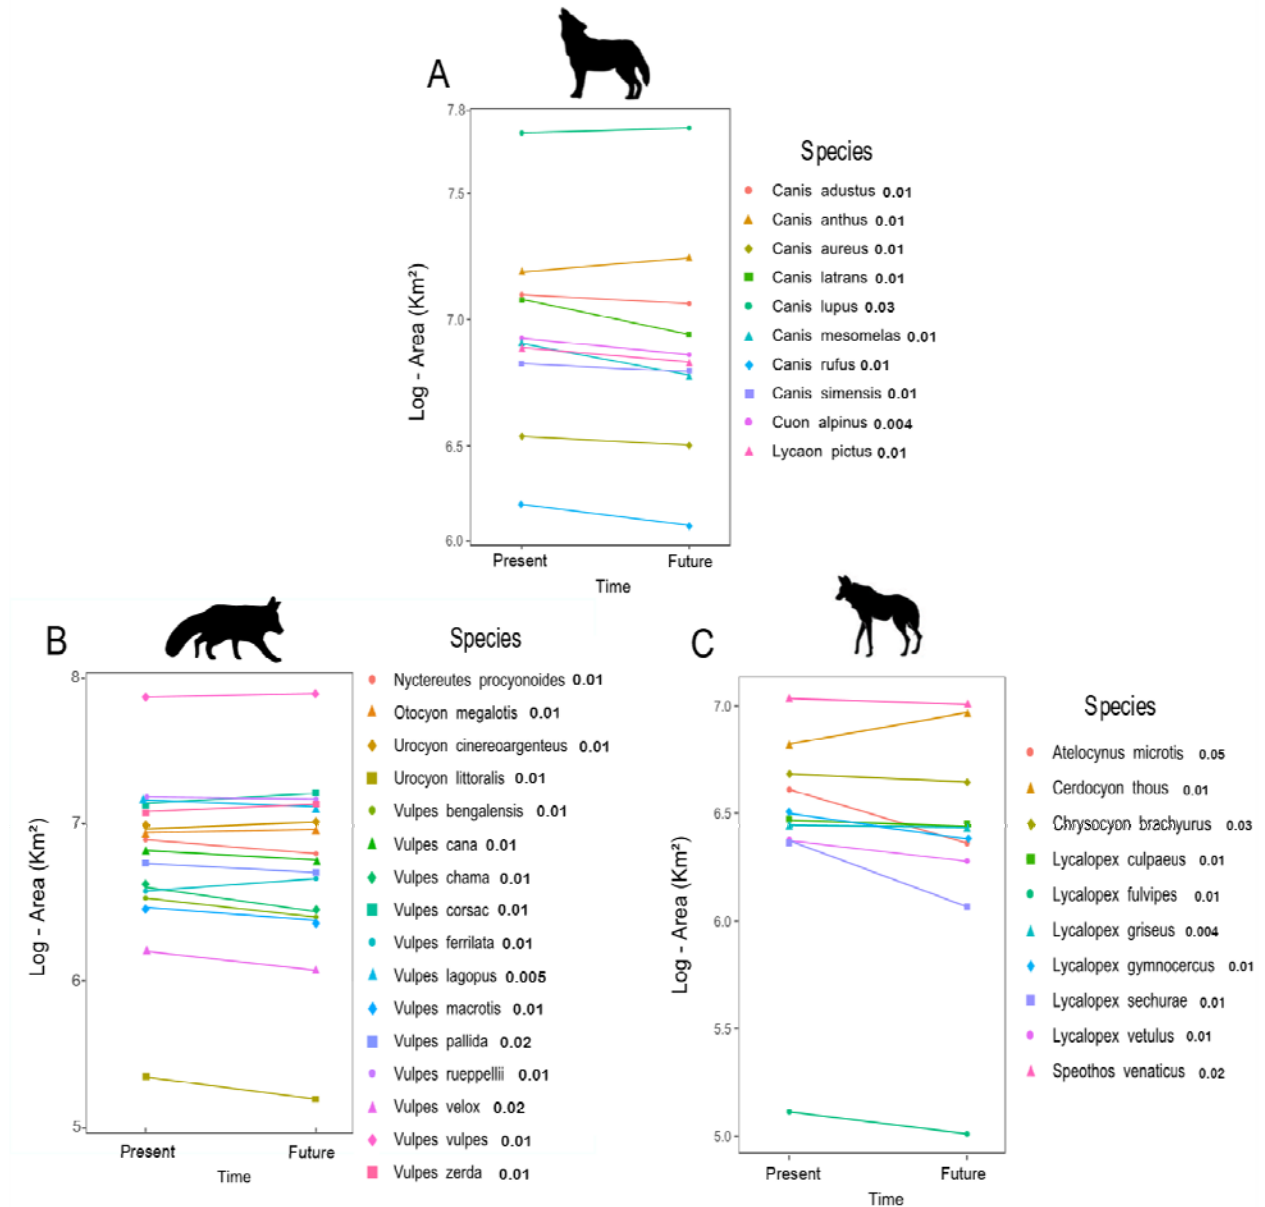

676

677 **FIGURE S38** Plot representation, on logarithmic scale, of range expansion or contraction  
 678 over time for the clades of wolves (A), foxes (B), and South American canids (C). *H* values  
 679 for each species are indicated next to each species name.

680

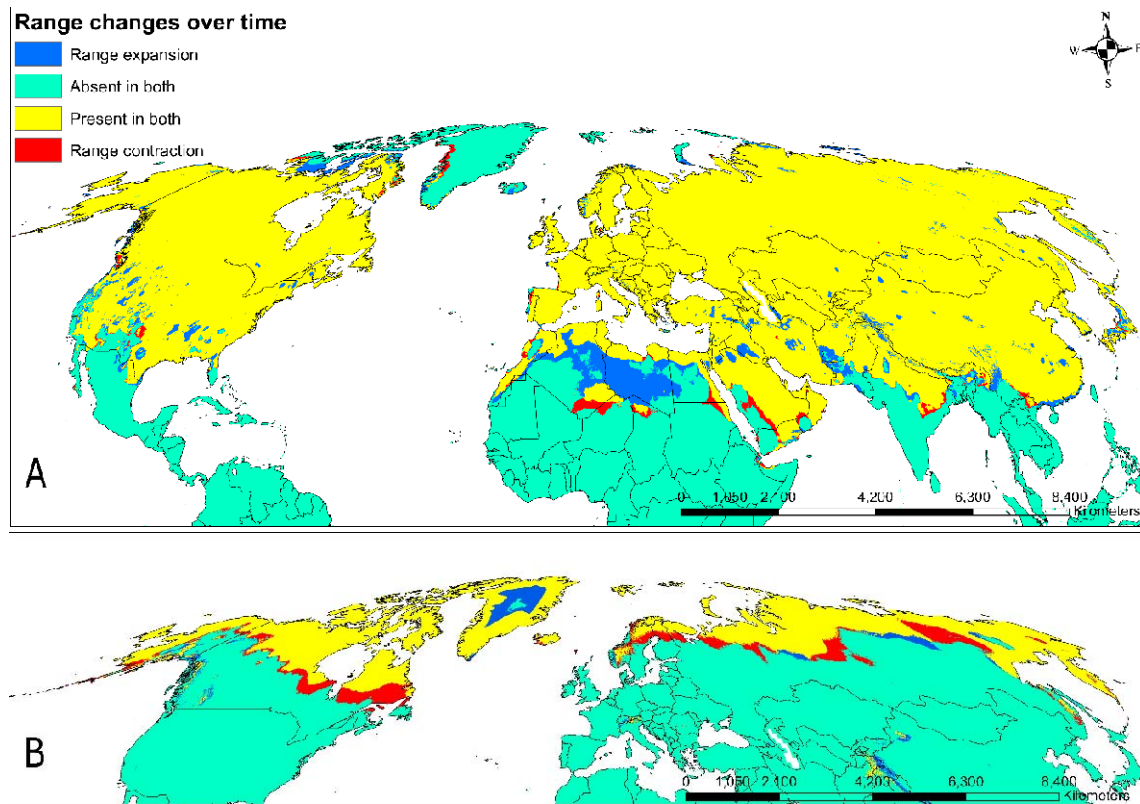

681

682 **FIGURE S51** Comparison of present and future suitable areas of *Vulpes vulpes* (A) and  
683 *Vulpes lagopus* (B). The image shows regions where loss is expected to occur (red) and  
684 regions where the species will increase their distributions (blue).

685
